# Supplementary material for: Assessing microplastics, per- and polyfluoroalkyl substances (PFAS), and other contaminants of global concern in wadable agricultural streams in Iowa
Source: Royal Society of Chemistry journal article supplement (doi:10.1039/d4em00753k), 2025-01-01
Supplement: d4em00753k1.xlsx [file d4em00753k1.xlsx]

## Sheet: S1_SiteInfo
Site number	Site name	Short name	Latitude, longitude	Basin size Mi2	Site type	Developed	Drainage	Cultivated	Pasture	AU	Pop	WWTP
05453000	Big Bear Creek at Ladora, Iowa	Big Bear Cr	41°44'58", -92°10'55"	189	poultry	5.7	483.8	80.8	9.7	170.9	15.6	10
06483495	Burr Oak Creek near Perkins, Iowa	Burr Oak Cr	43°14'43", -96°10'38"	30.9	mixed livestock	6.7	79.9	89.4	2.3	564.8	24.1	2
412957093193301	Camp Creek near Runnells, Iowa	Camp Cr	41°29'57", -93°19'33.3"	40.7	biosolids	6.8	40.7	68	15.3	68.5	60.5	2
414115091370301	Deer Creek near Coralville, Iowa	Deer Cr	41°41'14.57", -91°37'03.36"	10.1	biosolids	6.1	10.1	69.2	14.6	0	15.6	0
05420300	Elk River near Almont, Iowa	Elk River	42°00'38", -90°12'03"	55.9	cattle	5.4	55.9	84.8	5.5	207.3	22.5	2
421100093320002	HM-2	HM-2	42°11'00", -93°32'00"	31.5	poultry	4.3	89.8	92.8	1.9	381.7	2.7	0
06600030	Little Floyd River near Sanborn, Iowa	L Floyd River	43°11'09.6", -95°43'30.4	8.44	mixed livestock	8.5	21.9	88.8	1.5	379.7	31.4	1
05469860	Mud Lake near Jewell, Iowa	Mud Lake	42°18'52", -93°38'23"	65.4	swine	4.4	171.2	93.2	1.3	329.3	3.2	1
05454090	Muddy Creek near Coralville, Iowa	Muddy Cr	41°42'00", -91°33'46"	8.7	WWTP	60	22.2	17.5	7.1	0	589.4	2
05411260	North Cedar Creek near Clayton, Iowa	N Cedar Cr	42°57'46", -91°13'45"	5.1	reference	1.87	13.2	33.3	10.6	127.9	2	0
05476735	Pilot Creek at County Highway P15 near Rolfe, Iowa	Pilot Cr	42°48'20", -94°27'44	96.6	mixed livestock	4.6	247	93.3	1	212.2	3.99	1
05471382	Cardinal Creek below Newton, Iowa	Cardinal Cr	41.668934, -93.057853	1.69	WWTP	61.6	3.9	14.4	15.5	0	738.6	1
05451210	South Fork Iowa River near New Providence, Iowa	SF Iowa River	42°18'54.3", -93°09'07.4"	224	swine	4.61	581.7	87.6	3.7	497.9	2.8	2
420350094462201	Storm Creek near Glidden, Iowa	Storm Cr	42°03'50", -94°46'22"	56.1	cattle	5	56.1	93	1.5	642.6	13.5	5
05487980	South White Breast Creek near Osceola, Iowa	White Breast Cr	41°14'47.9", -93°17'24.6"	333	biosolids	4.8	856.3	24.5	41.3	13.3	11.95	8
Table S1. Site information for 15 Iowa streams, 2021.
[Mi2, miles squared; AU, animal units; Pop, population; WWTP, waste water treatment plant]
[Columns G-M land use data developed in ArcMap using the National Land Cover Database 2022 (https://www.mrlc.gov/data?f%5B0%5D=year%3A2022; date accessed: 3/24/2023). Column K Animal unit data from Animal Feeding Operation dataset (https://geodata.iowa.gov/app/iowadnr::animal-feeding-operations-siting-atlas; date accessed: 3/24/2023). Column L Population data obtained from the 2010 Census Blocks …

## Sheet: S2_Methods
Compound	Compound group	Laboratory	Method	LOD	Reporting Level	Units	Matrix	Reference
Bupropion	Pharmaceutical	University of Iowa	LC/MS-MS	1	--	ng/L	Water	Webb et al 2021, Zhi et al, 2020
Bupropion	Pharmaceutical	University of Iowa	LC/MS-MS	1	--	ng/g	Fish	Webb et al 2021, Zhi et al, 2020
Carbamazepine	Pharmaceutical	University of Iowa	LC/MS-MS	1.1	--	ng/L	Water	Webb et al 2021, Zhi et al, 2020
Citalopram hydrobromide	Pharmaceutical	University of Iowa	LC/MS-MS	1.5	--	ng/L	Water	Webb et al 2021, Zhi et al, 2020
Citalopram hydrobromide	Pharmaceutical	University of Iowa	LC/MS-MS	1.5	--	ng/g	Fish	Webb et al 2021, Zhi et al, 2020
O-desvenlafaxine hydrochloride	Pharmaceutical	University of Iowa	LC/MS-MS	0.7	--	ng/L	Water	Webb et al 2021, Zhi et al, 2020
Fexofenadine hydrochloride	Pharmaceutical	University of Iowa	LC/MS-MS	0.6	--	ng/L	Water	Webb et al 2021, Zhi et al, 2020
Fluconazole	Pharmaceutical	University of Iowa	LC/MS-MS	1.1	--	ng/L	Water	Webb et al 2021, Zhi et al, 2020
Guanylurea	Pharmaceutical	University of Iowa	LC/MS-MS	1.1	--	ng/L	Water	Webb et al 2021, Zhi et al, 2020
Lidocaine	Pharmaceutical	University of Iowa	LC/MS-MS	0.9	--	ng/L	Water	Webb et al 2021, Zhi et al, 2020
Metformin hydrochloride	Pharmaceutical	University of Iowa	LC/MS-MS	0.9	--	ng/L	Water	Webb et al 2021, Zhi et al, 2020
Methocarbamol	Pharmaceutical	University of Iowa	LC/MS-MS	2.4	--	ng/L	Water	Webb et al 2021, Zhi et al, 2020
Sulfamethoxazole	Pharmaceutical	University of Iowa	LC/MS-MS	1.3	--	ng/L	Water	Webb et al 2021, Zhi et al, 2020
Venlafaxine hydrochloride	Pharmaceutical	University of Iowa	LC/MS-MS	0.7	--	ng/L	Water	Webb et al 2021, Zhi et al, 2020
Venlafaxine hydrochloride	Pharmaceutical	University of Iowa	LC/MS-MS	0.7	--	ng/g	Fish	Webb et al 2021, Zhi et al, 2020
1H-Benzotriazole	Corrosion Inhibitor	University of Iowa	LC/MS-MS	0.8	--	ng/L	Water	Webb et al 2021, Zhi et al, 2020
5-Methyl-1H-Benzotriazole	Corrosion Inhibitor	University of Iowa	LC/MS-MS	0.6	--	ng/L	Water	Webb et al 2021, Zhi et al, 2020
Atrazine	Pesticide	University of Iowa	LC/MS-MS	1.2	--	ng/L	Water	Webb et al 2021, Zhi et al, 2020
Atrazine	Pesticide	University of Iowa	LC/MS-MS	1.2	--	ng/g	Fish	Webb et al 2021, Zhi et al, 2020
Acetamiprid	Pesticide	University of Iowa	LC/MS-MS	1	--	ng/L	Water	Webb et al 2021, Zhi et al, 2020
Clothianidin	Pesticide	University of Iowa	LC/MS-MS	2.5	--	ng/L	Water	Webb et al 2021, Zhi et al, 2020
Dinotefuran	Pesticide	University of Iowa	LC/MS-MS	1.1	--	ng/L	Water	Webb et al 2021, Zhi et al, 2020
Imidacloprid	Pesticide	University of Iowa	LC/MS-MS	0.7	--	ng/L	Water	Webb et al 2021, Zhi et al, 2020
Sulfoxaflor	Pesticide	University of Iowa	LC/MS-MS	2	--	ng/L	Water	Webb et al 2021, Zhi et al, 2020
Thiacloprid	Pesticide	University of Iowa	LC/MS-MS	2	--	ng/L	Water	Webb et al 2021, Zhi et al, 2020
Thiamethoxam	Pesticide	University of Iowa	LC/MS-MS	1.1	--	ng/L	Water	Webb et al 2021, Zhi et al, 2020
Metformin-d6	Surrogate Standard	University of Iowa	LC/MS-MS	NA	--	ng/L	Water	Webb et al 2021, Zhi et al, 2020
Bupropion-d9	Surrogate Standard	University of Iowa	LC/MS-MS	NA	--	ng/L	Water	Webb et al 2021, Zhi et al, 2020
Carbamazepine-d10	Surrogate Standard	University of Iowa	LC/MS-MS	NA	--	ng/L	Water	Webb et al 2021, Zhi et al, 2020
Citalopram-d6	Surrogate Standard	University of Iowa	LC/MS-MS	NA	--	ng/L	Water	Webb et al 2021, Zhi et al, 2020
Venlafaxine-d6 hydrochloride	Surrogate Standard	University of Iowa	LC/MS-MS	NA	--	ng/L	Water	Webb et al 2021, Zhi et al, 2020
Imidacloprid-d4	Surrogate Standard	University of Iowa	LC/MS-MS	NA	--	ng/L	Water	Webb et al 2021, Zhi et al, 2020
Thiamethoxam-d3	Internal Standard	University of Iowa	LC/MS-MS	NA	--	ng/L	Water	Webb et al 2021, Zhi et al, 2020
Caffeine13-C3	Internal Standard	University of Iowa	LC/MS-MS	NA	--	ng/L	Water	Webb et al 2021, Zhi et al, 2020
1H-1,2,4-Triazole	Pesticide	NWQL	LC/MS-MS	11	22	ng/L	Water	Sandstrom and others, 2015
2-(1-Hydroxyethyl)-6-methylaniline (HEMA)	Pesticide	NWQL	LC/MS-MS	80	160	ng/L	Water	Sandstrom and others, 2015
2,4-D	Pesticide	NWQL	LC/MS-MS	31	62	ng/L	Water	Sandstrom and others, 2015
2-[(2-Ethyl-6-methylphenyl)amino]-1-propanol	Pesticide	NWQL	LC/MS-MS	2.5	5	ng/L	Water	Sandstrom and others, 2015
2-Aminobenzimidazole	Pesticide	NWQL	LC/MS-MS	4.5	9	ng/L	Water	Sandstrom and others, 2015
2-Amino-N-isopropylbenzamide	Pesticide	NWQL	LC/MS-MS	2	4	ng/L	Water	Sandstrom and others, 2015
2-Chloro-2',6'-diethylacetanilide	Pesticide	NWQL	LC/MS-MS	2.5	5	ng/L	Water	Sandstrom and others, 2015
2-Chloro-N-(2-ethyl-6-methylphenyl)acetamide	Pesticide	NWQL	LC/MS-MS	2.5	5	ng/L	Water	Sandstrom and others, 2015
2-Hydroxy-4-isopropylamino-6-amino-s-triazine (OIAT)	Pesticide	NWQL	LC/MS-MS	2	4	ng/L	Water	Sandstrom and others, 2015
2-Hydroxy-6-ethylamino-4-amino-s-triazine (OEAT)	Pesticide	NWQL	LC/MS-MS	50	100	ng/L	Water	Sandstrom and others, 2015
2-Hydroxyatrazine (OIET)	Pesticide	NWQL	LC/MS-MS	4	8	ng/L	Water	Sandstrom and others, 2015
3,4-Dichlorophenylurea	Pesticide	NWQL	LC/MS-MS	27	108	ng/L	Water	Sandstrom and others, 2015
3-Hydroxycarbofuran	Pesticide	NWQL	LC/MS-MS	8	16	ng/L	Water	Sandstrom and others, 2015
3-Phenoxybenzoic acid	Pesticide	NWQL	LC/MS-MS	30	61	ng/L	Water	Sandstrom and others, 2015
4-(Hydroxymethyl) pendimethalin	Pesticide	NWQL	LC/MS-MS	38	114	ng/L	Water	Sandstrom and others, 2015
4-Chlorobenzylmethyl sulfoxide	Pesticide	NWQL	LC/MS-MS	1.6	3.2	ng/L	Water	Sandstrom and others, 2015
4-Hydroxychlorothalonil	Pesticide	NWQL	LC/MS-MS	21	42	ng/L	Water	Sandstrom and others, 2015
4-Hydroxyhexazinone A	Pesticide	NWQL	LC/MS-MS	1.5	3	ng/L	Water	Sandstrom and others, 2015
Acephate	Pesticide	NWQL	LC/MS-MS	5	10	ng/L	Water	Sandstrom and others, 2015
Acetochlor	Pesticide	NWQL	LC/MS-MS	5	10	ng/L	Water	Sandstrom and others, 2015
Acetochlor OA	Pesticide	NWQL	LC/MS-MS	13	65	ng/L	Water	Sandstrom and others, 2015
Acetochlor SA	Pesticide	NWQL	LC/MS-MS	160	320	ng/L	Water	Sandstrom and others, 2015
Acetochlor SAA	Pesticide	NWQL	LC/MS-MS	88	176	ng/L	Water	Sandstrom and others, 2015
Alachlor	Pesticide	NWQL	LC/MS-MS	9	27	ng/L	Water	Sandstrom and others, 2015
Alachlor OA	Pesticide	NWQL	LC/MS-MS	12	60	ng/L	Water	Sandstrom and others, 2015
Alachlor SA	Pesticide	NWQL	LC/MS-MS	420	840	ng/L	Water	Sandstrom and others, 2015
Aldicarb	Pesticide	NWQL	LC/MS-MS	4	8	ng/L	Water	Sandstrom and others, 2015
Aldicarb sulfone	Pesticide	NWQL	LC/MS-MS	10	20	ng/L	Water	Sandstrom and others, 2015
Aldicarb sulfoxide	Pesticide	NWQL	LC/MS-MS	1.1	2.2	ng/L	Water	Sandstrom and others, 2015
Ametryn	Pesticide	NWQL	LC/MS-MS	1.3	2.6	ng/L	Water	Sandstrom and others, 2015
Asulam	Pesticide	NWQL	LC/MS-MS	12	24	ng/L	Water	Sandstrom and others, 2015
Atrazine	Pesticide	NWQL	LC/MS-MS	3.4	6.8	ng/L	Water	Sandstrom and others, 2015
Azinphos-methyl	Pesticide	NWQL	LC/MS-MS	4	8	ng/L	Water	Sandstrom and others, 2015
Azinphos-methyl oxon	Pesticide	NWQL	LC/MS-MS	7.5	15	ng/L	Water	Sandstrom and others, 2015
Azoxystrobin	Pesticide	NWQL	LC/MS-MS	1.5	3	ng/L	Water	Sandstrom and others, 2015
Bentazon	Pesticide	NWQL	LC/MS-MS	4.5	9	ng/L	Water	Sandstrom and others, 2015
Bifenthrin	Pesticide	NWQL	LC/MS-MS	9.5	19	ng/L	Water	Sandstrom and others, 2015
Bromacil	Pesticide	NWQL	LC/MS-MS	2.8	5.6	ng/L	Water	Sandstrom and others, 2015
Bromoxynil	Pesticide	NWQL	LC/MS-MS	12	60	ng/L	Water	Sandstrom and others, 2015
Butralin	Pesticide	NWQL	LC/MS-MS	2.5	5	ng/L	Water	Sandstrom and others, 2015
Butylate	Pesticide	NWQL	LC/MS-MS	5	10	ng/L	Water	Sandstrom and others, 2015
Carbaryl	Pesticide	NWQL	LC/MS-MS	2.8	5.6	ng/L	Water	Sandstrom and others, 2015
Carbendazim	Pesticide	NWQL	LC/MS-MS	5	10	ng/L	Water	Sandstrom and others, 2015
Carbofuran	Pesticide	NWQL	LC/MS-MS	2.5	5	ng/L	Water	Sandstrom and others, 2015
Chlorimuron-ethyl	Pesticide	NWQL	LC/MS-MS	4.4	8.8	ng/L	Water	Sandstrom and others, 2015
Chlorpyrifos	Pesticide	NWQL	LC/MS-MS	1.5	3	ng/L	Water	Sandstrom and others, 2015
Chlorpyrifos oxon	Pesticide	NWQL	LC/MS-MS	2.2	4.4	ng/L	Water	Sandstrom and others, 2015
Chlorsulfuron	Pesticide	NWQL	LC/MS-MS	25	50	ng/L	Water	Sandstrom and others, 2015
cis-Cyhalothric acid	Pesticide	NWQL	LC/MS-MS	15	105	ng/L	Water	Sandstrom and others, 2015
cis-Permethrin	Pesticide	NWQL	LC/MS-MS	2.1	4.2	ng/L	Water	Sandstrom and others, 2015
Cyanazine	Pesticide	NWQL	LC/MS-MS	25	50	ng/L	Water	Sandstrom and others, 2015
DCPA monoacid (Chlorthal-monomethyl)	Pesticide	NWQL	LC/MS-MS	350	700	ng/L	Water	Sandstrom and others, 2015
Dechlorofipronil	Pesticide	NWQL	LC/MS-MS	1.9	3.8	ng/L	Water	Sandstrom and others, 2015
Dechlorometolachlor	Pesticide	NWQL	LC/MS-MS	1	2	ng/L	Water	Sandstrom and others, 2015
Deethylatrazine (CIAT)	Pesticide	NWQL	LC/MS-MS	5.5	11	ng/L	Water	Sandstrom and others, 2015
Deiodo flubendiamide	Pesticide	NWQL	LC/MS-MS	5	10	ng/L	Water	Sandstrom and others, 2015
Deisopropylatrazine (CEAT)	Pesticide	NWQL	LC/MS-MS	10	20	ng/L	Water	Sandstrom and others, 2015
Demethyl fluometuron	Pesticide	NWQL	LC/MS-MS	1.8	3.6	ng/L	Water	Sandstrom and others, 2015
Demethyl hexazinone B	Pesticide	NWQL	LC/MS-MS	1.5	3	ng/L	Water	Sandstrom and others, 2015
Demethyl norflurazon	Pesticide	NWQL	LC/MS-MS	2	4	ng/L	Water	Sandstrom and others, 2015
Desamino metribuzin (Metribuzin DA)	Pesticide	NWQL	LC/MS-MS	4.5	9	ng/L	Water	Sandstrom and others, 2015
Desamino-diketo metribuzin	Pesticide	NWQL	LC/MS-MS	100	200	ng/L	Water	Sandstrom and others, 2015
Desulfinylfipronil	Pesticide	NWQL	LC/MS-MS	1.9	3.8	ng/L	Water	Sandstrom and others, 2015
Desulfinylfipronil amide	Pesticide	NWQL	LC/MS-MS	5	10	ng/L	Water	Sandstrom and others, 2015
Diazinon	Pesticide	NWQL	LC/MS-MS	3.2	6.4	ng/L	Water	Sandstrom and others, 2015
Diazoxon	Pesticide	NWQL	LC/MS-MS	2	4	ng/L	Water	Sandstrom and others, 2015
Dicamba	Pesticide	NWQL	LC/MS-MS	200	800	ng/L	Water	Sandstrom and others, 2015
Dichlorvos	Pesticide	NWQL	LC/MS-MS	26	52	ng/L	Water	Sandstrom and others, 2015
Dicrotophos	Pesticide	NWQL	LC/MS-MS	2	4	ng/L	Water	Sandstrom and others, 2015
Didealkylatrazine (CAAT)	Pesticide	NWQL	LC/MS-MS	12	24	ng/L	Water	Sandstrom and others, 2015
Didemethyl hexazinone F (Hexazinone TP F)	Pesticide	NWQL	LC/MS-MS	5	10	ng/L	Water	Sandstrom and others, 2015
Diflubenzuron	Pesticide	NWQL	LC/MS-MS	3	6	ng/L	Water	Sandstrom and others, 2015
Diflufenzopyr	Pesticide	NWQL	LC/MS-MS	36	72	ng/L	Water	Sandstrom and others, 2015
Diketonitrile-isoxaflutole	Pesticide	NWQL	LC/MS-MS	5	10	ng/L	Water	Sandstrom and others, 2015
Dimethenamid	Pesticide	NWQL	LC/MS-MS	1.5	3	ng/L	Water	Sandstrom and others, 2015
Dimethenamid OA	Pesticide	NWQL	LC/MS-MS	42	85	ng/L	Water	Sandstrom and others, 2015
Dimethenamid SA	Pesticide	NWQL	LC/MS-MS	39	79	ng/L	Water	Sandstrom and others, 2015
Dimethoate	Pesticide	NWQL	LC/MS-MS	2.3	4.6	ng/L	Water	Sandstrom and others, 2015
Disulfoton	Pesticide	NWQL	LC/MS-MS	5.7	11	ng/L	Water	Sandstrom and others, 2015
Disulfoton oxon	Pesticide	NWQL	LC/MS-MS	1	2	ng/L	Water	Sandstrom and others, 2015
Disulfoton oxon sulfone	Pesticide	NWQL	LC/MS-MS	3	6	ng/L	Water	Sandstrom and others, 2015
Disulfoton oxon sulfoxide	Pesticide	NWQL	LC/MS-MS	3	6	ng/L	Water	Sandstrom and others, 2015
Disulfoton sulfone	Pesticide	NWQL	LC/MS-MS	4.5	9	ng/L	Water	Sandstrom and others, 2015
Disulfoton sulfoxide	Pesticide	NWQL	LC/MS-MS	2	4	ng/L	Water	Sandstrom and others, 2015
Diuron	Pesticide	NWQL	LC/MS-MS	2.5	5	ng/L	Water	Sandstrom and others, 2015
EPTC	Pesticide	NWQL	LC/MS-MS	103	206	ng/L	Water	Sandstrom and others, 2015
EPTC R248722	Pesticide	NWQL	LC/MS-MS	2	4	ng/L	Water	Sandstrom and others, 2015
Ethoprop	Pesticide	NWQL	LC/MS-MS	2.5	5	ng/L	Water	Sandstrom and others, 2015
Etoxazole	Pesticide	NWQL	LC/MS-MS	2.1	4.2	ng/L	Water	Sandstrom and others, 2015
Fenamiphos	Pesticide	NWQL	LC/MS-MS	2.3	4.6	ng/L	Water	Sandstrom and others, 2015
Fenamiphos sulfone	Pesticide	NWQL	LC/MS-MS	2.5	5	ng/L	Water	Sandstrom and others, 2015
Fenamiphos sulfoxide	Pesticide	NWQL	LC/MS-MS	2.5	5	ng/L	Water	Sandstrom and others, 2015
Fenbutatin oxide	Pesticide	NWQL	LC/MS-MS		500	ng/L	Water	Sandstrom and others, 2015
Fentin	Pesticide	NWQL	LC/MS-MS	15	30	ng/L	Water	Sandstrom and others, 2015
Fipronil	Pesticide	NWQL	LC/MS-MS	2	4	ng/L	Water	Sandstrom and others, 2015
Fipronil amide	Pesticide	NWQL	LC/MS-MS	4.6	9.2	ng/L	Water	Sandstrom and others, 2015
Fipronil sulfide	Pesticide	NWQL	LC/MS-MS	2.1	4.2	ng/L	Water	Sandstrom and others, 2015
Fipronil sulfonate	Pesticide	NWQL	LC/MS-MS	22	44	ng/L	Water	Sandstrom and others, 2015
Fipronil sulfone	Pesticide	NWQL	LC/MS-MS	2.8	5.6	ng/L	Water	Sandstrom and others, 2015
Flubendiamide	Pesticide	NWQL	LC/MS-MS	2.2	4.4	ng/L	Water	Sandstrom and others, 2015
Flumetsulam	Pesticide	NWQL	LC/MS-MS	19	38	ng/L	Water	Sandstrom and others, 2015
Fluometuron	Pesticide	NWQL	LC/MS-MS	1.7	10	ng/L	Water	Sandstrom and others, 2015
Fonofos	Pesticide	NWQL	LC/MS-MS	5.5	11	ng/L	Water	Sandstrom and others, 2015
Halosulfuron-methyl	Pesticide	NWQL	LC/MS-MS	3	12	ng/L	Water	Sandstrom and others, 2015
Hexazinone	Pesticide	NWQL	LC/MS-MS	1.8	3.6	ng/L	Water	Sandstrom and others, 2015
Hexazinone TP C	Pesticide	NWQL	LC/MS-MS	1	2	ng/L	Water	Sandstrom and others, 2015
Hexazinone TP D	Pesticide	NWQL	LC/MS-MS	147	294	ng/L	Water	Sandstrom and others, 2015
Hexazinone TP E	Pesticide	NWQL	LC/MS-MS	38	76	ng/L	Water	Sandstrom and others, 2015
Hexazinone TP G	Pesticide	NWQL	LC/MS-MS	11	22	ng/L	Water	Sandstrom and others, 2015
Hydroxy didemethyl fluometuron	Pesticide	NWQL	LC/MS-MS	25	50	ng/L	Water	Sandstrom and others, 2015
Hydroxy monodemethyl fluometuron	Pesticide	NWQL	LC/MS-MS	6.1	12	ng/L	Water	Sandstrom and others, 2015
Hydroxyacetochlor	Pesticide	NWQL	LC/MS-MS	10	20	ng/L	Water	Sandstrom and others, 2015
Hydroxyalachlor	Pesticide	NWQL	LC/MS-MS	3	6	ng/L	Water	Sandstrom and others, 2015
Hydroxydiazinon	Pesticide	NWQL	LC/MS-MS	5.5	11	ng/L	Water	Sandstrom and others, 2015
Hydroxymetolachlor	Pesticide	NWQL	LC/MS-MS	1.2	2.4	ng/L	Water	Sandstrom and others, 2015
Hydroxyphthalazinone	Pesticide	NWQL	LC/MS-MS	7	28	ng/L	Water	Sandstrom and others, 2015
Hydroxysimazine	Pesticide	NWQL	LC/MS-MS	24	120	ng/L	Water	Sandstrom and others, 2015
Imazamox	Pesticide	NWQL	LC/MS-MS	6	30	ng/L	Water	Sandstrom and others, 2015
Imazaquin	Pesticide	NWQL	LC/MS-MS	5	10	ng/L	Water	Sandstrom and others, 2015
Imazethapyr	Pesticide	NWQL	LC/MS-MS	4	8	ng/L	Water	Sandstrom and others, 2015
Imidacloprid	Pesticide	NWQL	LC/MS-MS	8.1	16	ng/L	Water	Sandstrom and others, 2015
Indoxacarb	Pesticide	NWQL	LC/MS-MS	2.6	5.2	ng/L	Water	Sandstrom and others, 2015
Isoxaflutole	Pesticide	NWQL	LC/MS-MS	9.1	18	ng/L	Water	Sandstrom and others, 2015
Isoxaflutole Acid RPA 203328	Pesticide	NWQL	LC/MS-MS	4.6	9.2	ng/L	Water	Sandstrom and others, 2015
Kresoxim-methyl	Pesticide	NWQL	LC/MS-MS	2.5	5	ng/L	Water	Sandstrom and others, 2015
Lactofen	Pesticide	NWQL	LC/MS-MS	5	10	ng/L	Water	Sandstrom and others, 2015
Linuron	Pesticide	NWQL	LC/MS-MS	2.8	5.6	ng/L	Water	Sandstrom and others, 2015
Malaoxon	Pesticide	NWQL	LC/MS-MS	27	54	ng/L	Water	Sandstrom and others, 2015
Malathion	Pesticide	NWQL	LC/MS-MS	2.7	5.4	ng/L	Water	Sandstrom and others, 2015
MCPA	Pesticide	NWQL	LC/MS-MS	48	95	ng/L	Water	Sandstrom and others, 2015
Metalaxyl	Pesticide	NWQL	LC/MS-MS	3	6	ng/L	Water	Sandstrom and others, 2015
Metconazole	Pesticide	NWQL	LC/MS-MS	2.5	5	ng/L	Water	Sandstrom and others, 2015
Methamidophos	Pesticide	NWQL	LC/MS-MS	5	10	ng/L	Water	Sandstrom and others, 2015
Methidathion	Pesticide	NWQL	LC/MS-MS	4.2	8.4	ng/L	Water	Sandstrom and others, 2015
Methomyl	Pesticide	NWQL	LC/MS-MS	1.5	3	ng/L	Water	Sandstrom and others, 2015
Methomyl oxime	Pesticide	NWQL	LC/MS-MS	4000	8000	ng/L	Water	Sandstrom and others, 2015
Methoxyfenozide	Pesticide	NWQL	LC/MS-MS	1.1	2.2	ng/L	Water	Sandstrom and others, 2015
Methyl paraoxon	Pesticide	NWQL	LC/MS-MS	9.5	19	ng/L	Water	Sandstrom and others, 2015
Metolachlor	Pesticide	NWQL	LC/MS-MS	1.6	3.2	ng/L	Water	Sandstrom and others, 2015
Metolachlor hydroxy morpholinone	Pesticide	NWQL	LC/MS-MS	5	10	ng/L	Water	Sandstrom and others, 2015
Metolachlor OA	Pesticide	NWQL	LC/MS-MS	74	149	ng/L	Water	Sandstrom and others, 2015
Metolachlor SA	Pesticide	NWQL	LC/MS-MS	34	68	ng/L	Water	Sandstrom and others, 2015
Metribuzin	Pesticide	NWQL	LC/MS-MS	10	20	ng/L	Water	Sandstrom and others, 2015
Metribuzin DK	Pesticide	NWQL	LC/MS-MS	118	236	ng/L	Water	Sandstrom and others, 2015
Molinate	Pesticide	NWQL	LC/MS-MS	7	28	ng/L	Water	Sandstrom and others, 2015
Myclobutanil	Pesticide	NWQL	LC/MS-MS	3.5	7	ng/L	Water	Sandstrom and others, 2015
N-(3,4-Dichlorophenyl)-N-methylurea (DCPMU)	Pesticide	NWQL	LC/MS-MS	2.5	5	ng/L	Water	Sandstrom and others, 2015
Naled	Pesticide	NWQL	LC/MS-MS	28	56	ng/L	Water	Sandstrom and others, 2015
Nicosulfuron	Pesticide	NWQL	LC/MS-MS	5.9	12	ng/L	Water	Sandstrom and others, 2015
Norflurazon	Pesticide	NWQL	LC/MS-MS	1.7	3.4	ng/L	Water	Sandstrom and others, 2015
Novaluron	Pesticide	NWQL	LC/MS-MS	25	50	ng/L	Water	Sandstrom and others, 2015
O-Ethyl O-methyl S-propyl phosphorothioate	Pesticide	NWQL	LC/MS-MS	2.5	5	ng/L	Water	Sandstrom and others, 2015
Omethoate	Pesticide	NWQL	LC/MS-MS	1	2	ng/L	Water	Sandstrom and others, 2015
Orthosulfamuron	Pesticide	NWQL	LC/MS-MS	3	6	ng/L	Water	Sandstrom and others, 2015
Oryzalin	Pesticide	NWQL	LC/MS-MS	5.9	12	ng/L	Water	Sandstrom and others, 2015
Oxamyl	Pesticide	NWQL	LC/MS-MS	1	2	ng/L	Water	Sandstrom and others, 2015
Oxamyl oxime	Pesticide	NWQL	LC/MS-MS	2.5	5	ng/L	Water	Sandstrom and others, 2015
Oxyfluorfen	Pesticide	NWQL	LC/MS-MS	250	500	ng/L	Water	Sandstrom and others, 2015
Paraoxon	Pesticide	NWQL	LC/MS-MS	1.7	3.4	ng/L	Water	Sandstrom and others, 2015
Pendimethalin	Pesticide	NWQL	LC/MS-MS	5	10	ng/L	Water	Sandstrom and others, 2015
Phorate	Pesticide	NWQL	LC/MS-MS	5.5	11	ng/L	Water	Sandstrom and others, 2015
Phorate oxon	Pesticide	NWQL	LC/MS-MS	11	55	ng/L	Water	Sandstrom and others, 2015
Phorate oxon sulfone	Pesticide	NWQL	LC/MS-MS	10	20	ng/L	Water	Sandstrom and others, 2015
Phorate oxon sulfoxide	Pesticide	NWQL	LC/MS-MS	3.5	7	ng/L	Water	Sandstrom and others, 2015
Phorate sulfone	Pesticide	NWQL	LC/MS-MS	18	36	ng/L	Water	Sandstrom and others, 2015
Phorate sulfoxide	Pesticide	NWQL	LC/MS-MS	2.3	4.6	ng/L	Water	Sandstrom and others, 2015
Phthalazinone	Pesticide	NWQL	LC/MS-MS	7.5	15	ng/L	Water	Sandstrom and others, 2015
Piperonyl butoxide	Pesticide	NWQL	LC/MS-MS	5	25	ng/L	Water	Sandstrom and others, 2015
Profenofos	Pesticide	NWQL	LC/MS-MS	1.5	3	ng/L	Water	Sandstrom and others, 2015
Prometon	Pesticide	NWQL	LC/MS-MS	2	4	ng/L	Water	Sandstrom and others, 2015
Prometryn	Pesticide	NWQL	LC/MS-MS	2.1	4.2	ng/L	Water	Sandstrom and others, 2015
Pronamide (Propyzamide)	Pesticide	NWQL	LC/MS-MS	1.2	2.4	ng/L	Water	Sandstrom and others, 2015
Propanil	Pesticide	NWQL	LC/MS-MS	6.2	12	ng/L	Water	Sandstrom and others, 2015
Propargite	Pesticide	NWQL	LC/MS-MS	1	2	ng/L	Water	Sandstrom and others, 2015
Propazine	Pesticide	NWQL	LC/MS-MS	1.6	3.2	ng/L	Water	Sandstrom and others, 2015
Propiconazole	Pesticide	NWQL	LC/MS-MS	3	6	ng/L	Water	Sandstrom and others, 2015
Propoxur	Pesticide	NWQL	LC/MS-MS	1.6	3.2	ng/L	Water	Sandstrom and others, 2015
Prosulfuron	Pesticide	NWQL	LC/MS-MS	5	10	ng/L	Water	Sandstrom and others, 2015
Pyraclostrobin	Pesticide	NWQL	LC/MS-MS	1.2	2.4	ng/L	Water	Sandstrom and others, 2015
Pyridaben	Pesticide	NWQL	LC/MS-MS	1.2	2.4	ng/L	Water	Sandstrom and others, 2015
Pyrimidinol (2-Isopropyl-6-methyl-4-pyrimidinol)	Pesticide	NWQL	LC/MS-MS	4	8	ng/L	Water	Sandstrom and others, 2015
Pyriproxyfen	Pesticide	NWQL	LC/MS-MS	1.5	3	ng/L	Water	Sandstrom and others, 2015
sec-Acetochlor OA	Pesticide	NWQL	LC/MS-MS	11	55	ng/L	Water	Sandstrom and others, 2015
Siduron	Pesticide	NWQL	LC/MS-MS	2.5	5	ng/L	Water	Sandstrom and others, 2015
Simazine	Pesticide	NWQL	LC/MS-MS	3.6	7.2	ng/L	Water	Sandstrom and others, 2015
Sulfentrazone	Pesticide	NWQL	LC/MS-MS	9	18	ng/L	Water	Sandstrom and others, 2015
Sulfometuron-methyl	Pesticide	NWQL	LC/MS-MS	2	4	ng/L	Water	Sandstrom and others, 2015
Sulfosulfuron	Pesticide	NWQL	LC/MS-MS	5.3	11	ng/L	Water	Sandstrom and others, 2015
Tebuconazole	Pesticide	NWQL	LC/MS-MS	2.5	15	ng/L	Water	Sandstrom and others, 2015
Tebufenozide	Pesticide	NWQL	LC/MS-MS	1	2	ng/L	Water	Sandstrom and others, 2015
Tebupirimfos	Pesticide	NWQL	LC/MS-MS	1	2	ng/L	Water	Sandstrom and others, 2015
Tebupirimfos oxon	Pesticide	NWQL	LC/MS-MS	1	2	ng/L	Water	Sandstrom and others, 2015
Tebuthiuron	Pesticide	NWQL	LC/MS-MS	1.5	3	ng/L	Water	Sandstrom and others, 2015
Tebuthiuron TP 104	Pesticide	NWQL	LC/MS-MS	2.8	5.6	ng/L	Water	Sandstrom and others, 2015
Tebuthiuron TP 108	Pesticide	NWQL	LC/MS-MS	5	10	ng/L	Water	Sandstrom and others, 2015
Tebuthiuron TP 109 (OH)	Pesticide	NWQL	LC/MS-MS	19	38	ng/L	Water	Sandstrom and others, 2015
Tebuthurion TP 109	Pesticide	NWQL	LC/MS-MS	5.5	11	ng/L	Water	Sandstrom and others, 2015
Terbacil	Pesticide	NWQL	LC/MS-MS	10	21	ng/L	Water	Sandstrom and others, 2015
Terbufos	Pesticide	NWQL	LC/MS-MS	3.4	6.8	ng/L	Water	Sandstrom and others, 2015
Terbufos oxon	Pesticide	NWQL	LC/MS-MS	2	4	ng/L	Water	Sandstrom and others, 2015
Terbufos oxon sulfone	Pesticide	NWQL	LC/MS-MS	5.5	11	ng/L	Water	Sandstrom and others, 2015
Terbufos oxon sulfoxide	Pesticide	NWQL	LC/MS-MS	2	4	ng/L	Water	Sandstrom and others, 2015
Terbufos sulfone	Pesticide	NWQL	LC/MS-MS	16	32	ng/L	Water	Sandstrom and others, 2015
Terbufos sulfoxide	Pesticide	NWQL	LC/MS-MS	1.5	3	ng/L	Water	Sandstrom and others, 2015
Terbuthylazine	Pesticide	NWQL	LC/MS-MS	1.8	3.6	ng/L	Water	Sandstrom and others, 2015
Tetraconazole	Pesticide	NWQL	LC/MS-MS	3.5	7	ng/L	Water	Sandstrom and others, 2015
Thiobencarb	Pesticide	NWQL	LC/MS-MS	2.1	4.2	ng/L	Water	Sandstrom and others, 2015
trans-Permethrin	Pesticide	NWQL	LC/MS-MS	1.9	3.8	ng/L	Water	Sandstrom and others, 2015
Triallate	Pesticide	NWQL	LC/MS-MS	6.2	12	ng/L	Water	Sandstrom and others, 2015
Tribuphos	Pesticide	NWQL	LC/MS-MS	1	2	ng/L	Water	Sandstrom and others, 2015
Triclopyr	Pesticide	NWQL	LC/MS-MS	44	88	ng/L	Water	Sandstrom and others, 2015
Trifloxystrobin	Pesticide	NWQL	LC/MS-MS	1.4	2.8	ng/L	Water	Sandstrom and others, 2015
Low Level Phosphorus - WCA	Nutrient	NWQL	CL021	0.003	0.006	mg/L	Water	Patton and Kryskalla, 2011
Alkaline Persulfate-Nitrogen, WCA	Nutrient	NWQL	AKP01	0.05	0.1	mg/L	Water	Patton and Kryskalla, 2011
Ammonia, Kone	Nutrient	NWQL	SHC02	0.02	0.04	mg/L	Water	Patton and Kryskalla, 2011
Nitrite, Kone	Nutrient	NWQL	DZ001	0.001	0.002	mg/L	Water	Patton and Kryskalla, 2011
ortho-PO4, Kone	Nutrient	NWQL	PHM01	0.004	0.008	mg/L	Water	Patton and Kryskalla, 2011
NO2 + NO3, as N, Kone	Nutrient	NWQL	RED01	0.04	0.08	mg/L	Water	Patton and Kryskalla, 2011
Perfluorobutyrate (PFBA)	Per and polyfluoroalkyl substance	NWQL	LC/MS-MS	2.5	2.5	ng/L	Water	Kolpin et al., 2021
Perfluoro-n-decanoate (PFDA)	Per and polyfluoroalkyl substance	NWQL	LC/MS-MS	5	5	ng/L	Water	Kolpin et al., 2021
Perfluorododecanoate (PFDoDA)	Per and polyfluoroalkyl substance	NWQL	LC/MS-MS	25	25	ng/L	Water	Kolpin et al., 2021
Perfluoro-n-heptanoate (PFHpA)	Per and polyfluoroalkyl substance	NWQL	LC/MS-MS	25	25	ng/L	Water	Kolpin et al., 2021
Perfluoro-n-hexanoate (PFHxA)	Per and polyfluoroalkyl substance	NWQL	LC/MS-MS	25	25	ng/L	Water	Kolpin et al., 2021
Perfluoro-n-nonanoate (PFNA)	Per and polyfluoroalkyl substance	NWQL	LC/MS-MS	5	5	ng/L	Water	Kolpin et al., 2021
Perfluoro-n-octanoate (PFOA)	Per and polyfluoroalkyl substance	NWQL	LC/MS-MS	10	10	ng/L	Water	Kolpin et al., 2021
Perfluoro-n-pentanoate (PFPeA)	Per and polyfluoroalkyl substance	NWQL	LC/MS-MS	5	5	ng/L	Water	Kolpin et al., 2021
Perfluoro-n-undecanoate (PFUnDA)	Per and polyfluoroalkyl substance	NWQL	LC/MS-MS	10	10	ng/L	Water	Kolpin et al., 2021
Perfluoro-1-butanesulfonate (PFBS)	Per and polyfluoroalkyl substance	NWQL	LC/MS-MS	4.43	4.43	ng/L	Water	Kolpin et al., 2021
Perfluoro-1-decanesulfonate (PFDS)	Per and polyfluoroalkyl substance	NWQL	LC/MS-MS	9.65	9.65	ng/L	Water	Kolpin et al., 2021
Perfluoro-1-heptanesulfonate (PFHpS)	Per and polyfluoroalkyl substance	NWQL	LC/MS-MS	4.75	4.75	ng/L	Water	Kolpin et al., 2021
Perfluoro-1-hexanesulfonate (PFHxS)(linear)	Per and polyfluoroalkyl substance	NWQL	LC/MS-MS	7.4	7.4	ng/L	Water	Kolpin et al., 2021
Perfluoro-1-hexanesulfonate (PFHxS)(branched)	Per and polyfluoroalkyl substance	NWQL	LC/MS-MS	9.12	9.12	ng/L	Water	Kolpin et al., 2021
Perfluoro-1-nonanesulfonate (PFNS)	Per and polyfluoroalkyl substance	NWQL	LC/MS-MS	4.8	4.8	ng/L	Water	Kolpin et al., 2021
Perfluorooctanesulfonate (PFOS)(linear)	Per and polyfluoroalkyl substance	NWQL	LC/MS-MS	7.3	7.3	ng/L	Water	Kolpin et al., 2021
Perfluorooctanesulfonate (PFOS)(branched)	Per and polyfluoroalkyl substance	NWQL	LC/MS-MS	9.26	9.26	ng/L	Water	Kolpin et al., 2021
Perfluoro-1-pentanesulfonate (PFPeS)	Per and polyfluoroalkyl substance	NWQL	LC/MS-MS	2.35	2.35	ng/L	Water	Kolpin et al., 2021
1H,1H,2H,2H-Perfluorohexane sulfonate (4:2) (4:2 FTS)	Per and polyfluoroalkyl substance	NWQL	LC/MS-MS	4.68	4.68	ng/L	Water	Kolpin et al., 2021
1H,1H,2H,2H-Perfluorohexane sulfonate (6:2) (6:2 FTS)	Per and polyfluoroalkyl substance	NWQL	LC/MS-MS	9.5	9.5	ng/L	Water	Kolpin et al., 2021
1H,1H,2H,2H-Perfluorohexane sulfonate (8:2) (8:2 FTS)	Per and polyfluoroalkyl substance	NWQL	LC/MS-MS	24	24	ng/L	Water	Kolpin et al., 2021
Perfluorobutane sulfonamide (FBSA)	Per and polyfluoroalkyl substance	NWQL	LC/MS-MS	25	25	ng/L	Water	Kolpin et al., 2021
Perfluoro-1-hexanesulfonamide (FHx-SA)	Per and polyfluoroalkyl substance	NWQL	LC/MS-MS	25	25	ng/L	Water	Kolpin et al., 2021
Perfluoro-1-octanesulfonamide (FOSA)	Per and polyfluoroalkyl substance	NWQL	LC/MS-MS	2.5	2.5	ng/L	Water	Kolpin et al., 2021
N-ethyl perfluorooctanesulfonamidoacetate (N-EtFOSAA)	Per and polyfluoroalkyl substance	NWQL	LC/MS-MS	10	10	ng/L	Water	Kolpin et al., 2021
N-methylperfluorooctane sulfonamidoacetate (N-MeFOSAA)	Per and polyfluoroalkyl substance	NWQL	LC/MS-MS	10	10	ng/L	Water	Kolpin et al., 2021
9-Chlorohexadecafluoro-3-oxanonane-1-sulfonate (9Cl-PF3ONS)	Per and polyfluoroalkyl substance	NWQL	LC/MS-MS	5	5	ng/L	Water	Kolpin et al., 2021
4,8-Dioxa-3H-perfluorononanoate (NaDONA, ADONA)	Per and polyfluoroalkyl substance	NWQL	LC/MS-MS	1	1	ng/L	Water	Kolpin et al., 2021
Hexafluoropropylene oxide dimer acid (HFPO-DA)(GenX)	Per and polyfluoroalkyl substance	NWQL	LC/MS-MS	5	5	ng/L	Water	Kolpin et al., 2021
11-Chloroeicosfluoro-3-oxaundecane-1-sulfonate (11Cl-PF3OYUdS)	Per and polyfluoroalkyl substance	SGS AXYS	LC/MS-MS	--	763	ng/kg	Fish/Bed sediment	www.sgsaxys.com
1H,1H,2H,2H-Perfluorodecanesulfonate (8:2 FTS)	Per and polyfluoroalkyl substance	SGS AXYS	LC/MS-MS	--	979	ng/kg	Fish/Bed sediment	www.sgsaxys.com
1H,1H,2H,2H-Perfluorohexanesulfonate (4:2 FTS)	Per and polyfluoroalkyl substance	SGS AXYS	LC/MS-MS	--	1544	ng/kg	Fish/Bed sediment	www.sgsaxys.com
1H,1H,2H,2H-Perfluorooctanesulfonate (6:2 FTS)	Per and polyfluoroalkyl substance	SGS AXYS	LC/MS-MS	--	962	ng/kg	Fish/Bed sediment	www.sgsaxys.com
9-Chlorohexadecafluoro-3-oxanonane-1-sulfonate (9Cl-PF3ONS)	Per and polyfluoroalkyl substance	SGS AXYS	LC/MS-MS	--	680	ng/kg	Fish/Bed sediment	www.sgsaxys.com
Dodecafluoro-3H-4,8-dioxanonanoate (ADONA)	Per and polyfluoroalkyl substance	SGS AXYS	LC/MS-MS	--	539	ng/kg	Fish/Bed sediment	www.sgsaxys.com
HFPO-DA (GEN X)	Per and polyfluoroalkyl substance	SGS AXYS	LC/MS-MS	--	939	ng/kg	Fish/Bed sediment	www.sgsaxys.com
N-ethyl perfluorooctanesulfonamidoacetic acid (N-EtFOSAA)	Per and polyfluoroalkyl substance	SGS AXYS	LC/MS-MS	--	1373	ng/kg	Fish/Bed sediment	www.sgsaxys.com
N-methyl perfluorooctanesulfonamidoacetic acid (N-MeFOSAA)	Per and polyfluoroalkyl substance	SGS AXYS	LC/MS-MS	--	1022	ng/kg	Fish/Bed sediment	www.sgsaxys.com
Perfluorobutanesulfonic acid (PFBS)	Per and polyfluoroalkyl substance	SGS AXYS	LC/MS-MS	--	454	ng/kg	Fish/Bed sediment	www.sgsaxys.com
Perfluorobutanoic acid (PFBA)	Per and polyfluoroalkyl substance	SGS AXYS	LC/MS-MS	--	944	ng/kg	Fish/Bed sediment	www.sgsaxys.com
Perfluorodecanesulfonate (PFDS)	Per and polyfluoroalkyl substance	SGS AXYS	LC/MS-MS	--	838	ng/kg	Fish/Bed sediment	www.sgsaxys.com
Perfluorodecanoic acid (PFDA)	Per and polyfluoroalkyl substance	SGS AXYS	LC/MS-MS	--	680	ng/kg	Fish/Bed sediment	www.sgsaxys.com
Perfluorododecanoic acid (PFDoA)	Per and polyfluoroalkyl substance	SGS AXYS	LC/MS-MS	--	1080	ng/kg	Fish/Bed sediment	www.sgsaxys.com
Perfluoroheptanesulfonate (PFHpS)	Per and polyfluoroalkyl substance	SGS AXYS	LC/MS-MS	--	807	ng/kg	Fish/Bed sediment	www.sgsaxys.com
Perfluoroheptanoic acid (PFHpA)	Per and polyfluoroalkyl substance	SGS AXYS	LC/MS-MS	--	1171	ng/kg	Fish/Bed sediment	www.sgsaxys.com
Perfluorohexanesulfonic acid (PFHxS)	Per and polyfluoroalkyl substance	SGS AXYS	LC/MS-MS	--	668	ng/kg	Fish/Bed sediment	www.sgsaxys.com
Perfluorohexanoic acid (PFHxA)	Per and polyfluoroalkyl substance	SGS AXYS	LC/MS-MS	--	878	ng/kg	Fish/Bed sediment	www.sgsaxys.com
Perfluorononanesulfonate (PFNS)	Per and polyfluoroalkyl substance	SGS AXYS	LC/MS-MS	--	1133	ng/kg	Fish/Bed sediment	www.sgsaxys.com
Perfluorononanoic acid (PFNA)	Per and polyfluoroalkyl substance	SGS AXYS	LC/MS-MS	--	944	ng/kg	Fish/Bed sediment	www.sgsaxys.com
Perfluorooctanesulfonic acid (PFOS)	Per and polyfluoroalkyl substance	SGS AXYS	LC/MS-MS	--	763	ng/kg	Fish/Bed sediment	www.sgsaxys.com
Perfluorooctanoic acid (PFOA)	Per and polyfluoroalkyl substance	SGS AXYS	LC/MS-MS	--	1088	ng/kg	Fish/Bed sediment	www.sgsaxys.com
Perfluorooctansulfonamide (FOSA)	Per and polyfluoroalkyl substance	SGS AXYS	LC/MS-MS	--	667	ng/kg	Fish/Bed sediment	www.sgsaxys.com
Perfluoropentanesulfonate (PFPeS)	Per and polyfluoroalkyl substance	SGS AXYS	LC/MS-MS	--	1064	ng/kg	Fish/Bed sediment	www.sgsaxys.com
Perfluoropentanoic acid (PFPeA)	Per and polyfluoroalkyl substance	SGS AXYS	LC/MS-MS	--	1249	ng/kg	Fish/Bed sediment	www.sgsaxys.com
Perfluorotetradecanoic acid (PFTeDA)	Per and polyfluoroalkyl substance	SGS AXYS	LC/MS-MS	--	807	ng/kg	Fish/Bed sediment	www.sgsaxys.com
Perfluorotridecanoic acid (PFTrDA)	Per and polyfluoroalkyl substance	SGS AXYS	LC/MS-MS	--	763	ng/kg	Fish/Bed sediment	www.sgsaxys.com
Perfluoroundecanoic acid (PFUdA)	Per and polyfluoroalkyl substance	SGS AXYS	LC/MS-MS	--	1006	ng/kg	Fish/Bed sediment	www.sgsaxys.com
pH	Physical measurement	FIELD	Sonde	--	--	Standard units	Water	U.S. Geological Survey, 2018
Specific conductance	Physical measurement	FIELD	Sonde	--	--	uS/cm at 25 degrees Celsius	Water	U.S. Geological Survey, 2018
Oxygen, dissolved	Physical measurement	FIELD	Sonde	--	--	mg/L	Water	U.S. Geological Survey, 2018
Water temperature	Physical measurement	FIELD	Sonde	--	--	Degrees Celsius	Water	U.S. Geological Survey, 2018
Turbidity	Physical measurement	FIELD	Sonde	--	--	FNU	Water	U.S. Geological Survey, 2018
Microplastics	Microplastics	University of Illinois		400um2	--	CPL	Water	Scott and Green, 2020
Microplastics	Microplastics	University of Illinois		400um2	--	CPG	Bed sediment	Scott and Green, 2020
Microplastics	Microplastics	University of Illinois		400um2	--	Total counts	Fish	Scott and Green, 2020
Suspended sediment	Physical measurement	CMWSC	SSC	0.5	1	mg/L	Water	Knott and others, 1993
Estrogenicity	Estrogen equivalents (EEQ)	EESC	BLYES	0.066	0.23	ng/L	Water	adapted from Ciparis and others, 2012
Table S2. Method information for 15 Iowa streams, 2021.
[NWIS, National Water Information System; RL, reporting limit; NA, not available; NWQL, USGS National Water Quality Laboratory; EESC, Eastern Ecological Science Center; CMWSC, USGS Central Midwest Water Science Center; GC, gas chromatography; LC, liquid chromatography; uS/cm, microsiemens per centimeter at 25 degrees Celsius; ug/l, micrograms per liter; mg/L, milligrams per liter; ng/L, nanograms…

## Sheet: S3_ARGMethods
Target gene	Gene product	AMR Drug Class	Positive control source	Reference
16S rDNA	16S rRNA	--	synthetic vector (Genewiz; South Plainfield, New Jersey)	Hembach et al., 2017
blaACC	ACC AmpC beta-lactamase	monobactam, cephalosporin, penam	ampC kit DNA (Streck Laboratories; Omaha, Nebraska)	Perez and Hanson, 2002
blaTEM	TEM beta-lactamase	monobactam, cephalosporin, penam, penem	synthetic vector (Genewiz; South Plainfield, New Jersey)	Hembach et al., 2017
blaCIT	CMY beta-lactamase	cephamycin	ampC kit DNA (Streck Laboratories; Omaha, Nebraska)	Perez and Hanson, 2002
blaCMY-2	CMY beta-lactamase	cephalosporin, cephamycin	synthetic vector (Genewiz; South Plainfield, New Jersey)	Hembach et al., 2017
blaCTX-M-32	CTX-M beta-lactamase	cephalosporin	synthetic vector (Genewiz; South Plainfield, New Jersey)	Hembach et al., 2017
blaCTX-M	CTX-M beta-lactamase	cephalosporin	synthetic vector (Genewiz; South Plainfield, New Jersey)	Hembach et al., 2017
blaDHA	DHA AmpC beta-lactamase	cephalosporin, cephamycin	ampC kit DNA (Streck Laboratories; Omaha, Nebraska)	Perez and Hanson, 2002
blaEBC	ACT/MIR AmpC beta-lactamase	cephalosporin, cephamycin, penam, carbapenem/monobactam, cephalosporin	ampC kit DNA (Streck Laboratories; Omaha, Nebraska)	Perez and Hanson, 2002
ermB	Erm 23S ribosomal RNA methyltransferase	macrolide, lincosamide, streptogramin	synthetic vector (Genewiz; South Plainfield, New Jersey)	Hembach et al., 2017
femA	48k Daa protein, protein precursor in peptidoglycan biosynthesis	--	Staphylococcus aureus ATCC 43300	Reischl et al., 2000
flost	florfenicol	phenicol	Salmonella enterica subsp. Enterica serovar Typhimurium ATCC 14028	Khan et al., 2000
blaFOX	FOX AmpC beta-lactamase	cephalosporin, cephamycin	ampC kit DNA (Streck Laboratories; Omaha, Nebraska)	Perez and Hanson, 2002
int	integron, integrase	--	Salmonella enterica subsp. Enterica serovar Typhimurium ATCC 14028	Khan et al., 2000
invA	invasion determinant A	--	Salmonella enterica subsp. Enterica serovar Typhimurium ATCC 14028	Khan et al., 2000
mcr-1	MCR phosphoethanolamine transferase	peptide, colistin	synthetic vector (Genewiz; South Plainfield, New Jersey)	Hembach et al., 2017
mecA	penicillin binding protein 2A	penam	Staphylococcus aureus ATCC 43300	Mehrotra et al., 2000
blaMOX	MOX AmpC beta-lactamase	cephalosporin, cephamycin, penam	ampC kit DNA (Streck Laboratories; Omaha, Nebraska)	Perez and Hanson, 2002
qnrA	quinolone resistance protein	fluoroquinolone	Escherichia coli ATCC 102203	Cattoir et al., 2007
qnrB	quinolone resistance protein	fluoroquinolone	Klebsiella pneumoniae ATCC 13883	Cattoir et al., 2007
qnrS	quinolone resistance protein	fluoroquinolone	Enterobacter cloacae ATCC 13047	Cattoir et al., 2007
spvC	plasmid of virulence	--	Salmonella enterica subsp. Enterica serovar Typhimurium ATCC-14028	Khan et al., 2000
tetM	tetracycline-resistant ribosomal protection protein	tetracycline	synthetic vector (Genewiz; South Plainfield, New Jersey)	Hembach et al., 2017
vanA	Van ligase	glycopeptide; vancomycin, teicoplanin	Enterococcus faecium ATCC 700221	Dutka-Malen et al., 1995
vanB	Van ligase	glycopeptide; vancomycin	Enterococcus faecalis ATCC 51299	Dutka-Malen et al., 1995
Table S3. Molecular methods for detection of bacterial gene markers performed by the Michigan Bacteriological Research Laboratory, Lansing, Michigan, for 15 Iowa streams, 2021.
[rDNA, ribosomal deoxynucleic acid (DNA); bla, gene encoding a beta-lactamase enzyme; rRNA, ribosomal ribonucleic acid; AMR, antimicrobial resistance; --, not applicable]

## Sheet: S4_CultivationMethods
Target organism	Method	Method type	Growth medium	Temperature (C)	Time (hours)	Atmosphere	Units	Reference
Heterotrophic bacteria	Cultivation	enumeration	IDEXX HPC	37	44	aerobic	MPN/100 mL or 1 g	IDEXX 2013
Total coliforms	Cultivation	enumeration	IDEXX Colilert	37	24	aerobic	MPN/100 mL or 1 g	“9223 ENZYME SUBSTRATE COLIFORM TEST”, Standard Methods For the Examination of Water and Wastewater
Escherichia coli	Cultivation	enumeration	IDEXX Colilert	37	24	aerobic	MPN/100 mL or 1 g	“9223 ENZYME SUBSTRATE COLIFORM TEST”, Standard Methods For the Examination of Water and Wastewater
Enterococci	Cultivation	enumeration	IDEXX Enterolert	41	24	aerobic	MPN/100 mL or 1 g	Standard Methods Committee of the American Public Health Association, American Water Works Association, and Water Environment Federation. 9230 fecal enterococcus/streptococcus groups In: Standard Methods For the Examination of Water and Wastewater. Lipps WC, Baxter TE, Braun-Howland E, editors. Washington DC: APHA Press
Table S4. Bacteria cultivation methods for analyses performed by Michigan Bacteriological Research Laboratory, Lansing, Michigan, for 15 Iowa streams, 2021.
[MPN/100 mL or 1 g, most probable number per 100 milliliters or 1 gram; mL, milliliter; g, gram; C, degrees Celsius]

## Sheet: S5_AnalyteDetections
		Water Samples					Bed Sediment Samples					Fish Samples
Contaminant	Type	Detect	Percent detection	minimum C	median C	maximum C	Detect	Percent detection	minimum C	median C	maximum C	Detect	Percent detection	minimum C	median C	maximum C
PFDA	PFAS	0/15	0	--	--	--	2/15	13	78.7	--	186	8/13	61	110	533	9620
PFUnDA	PFAS	0/15	0	--	--	--	3/15	20	46.9	81.8	330	10/13	77	103	241	620
bla_acc	ARG	9/15	60	--	--	--	7/14	50	--	--	--	--	--	--	--	--
bla_ctx-m	ARG	4/15	27	--	--	--	7/14	50	--	--	--	--	--	--	--	--
PFOS	PFAS	0/15	0	--	--	--	8/15	53	45.3	55.25	413	13/13	100	413	3040	8580
flo_st	ARG	4/15	27	--	--	--	9/14	64	--	--	--	--	--	--	--	--
bla_cmy-2	ARG	1/15	7	--	--	--	9/14	64	--	--	--	--	--	--	--	--
qnr_B	ARG	3/15	20	--	--	--	10/14	71	--	--	--	--	--	--	--	--
Escherichia coli	Microbial	15/15	100	260	2450	18270	12/14	86	10	103	512	--	--	--	--	--
int	ARG	13/15	87	--	--	--	12/14	86	--	--	--	--	--	--	--	--
bla_fox	ARG	9/15	60	--	--	--	12/14	86	--	--	--	--	--	--	--	--
Microplastics	Microplastics	15/15	100	112	220	17033	15/15	100	3782	43668	109435	5/5	100	199	301	1168
Heterotrophic bacteria	Microbial	15/15	100	9090	77100	>2419600	14/14	100	5475	>241960	>241960	--	--	--	--	--
Total coliforms	Microbial	15/15	100	4430	77100	120980	14/14	100	10	1821	129970	--	--	--	--	--
Atrazine	Pesticide	15/15	100	9.4332	67.7725	1386.29	--	--	--	--	--	--	--	--	--	--
MetolachlorSA	Pesticide	15/15	100	197.085	595.256	1596.23	--	--	--	--	--	--	--	--	--	--
OIET	Pesticide	15/15	100	30.8173	60.9725	152.929	--	--	--	--	--	--	--	--	--	--
Metolachlor	Pesticide	14/15	93	3.7844	77.9099	612.065	--	--	--	--	--	--	--	--	--	--
CAAT	Pesticide	14/15	93	26.1223	100.455	316.375	--	--	--	--	--	--	--	--	--	--
CIAT	Pesticide	14/15	93	8.2725	42.112	199.684	--	--	--	--	--	--	--	--	--	--
Metformin	PPCP	13/15	87	113.333	822.5	8990	--	--	--	--	--	--	--	--	--	--
Atrazine (UI)	Pesticide	13/15	87	7.86605	41.8219	321.637	--	--	--	--	--	4/13	31	0.1	1.2	1.2
Acetochlor	Pesticide	12/15	80	3.3215	65.5175	608.565	--	--	--	--	--	--	--	--	--	--
Dechlorometolachlor	Pesticide	12/15	80	2.2673	7.3442	41.091	--	--	--	--	--	--	--	--	--	--
AcetochlorOA	Pesticide	11/15	73	36.2217	203.514	1251.32	--	--	--	--	--	--	--	--	--	--
Imazethapyr	Pesticide	10/15	67	4.1411	18.8133	69.973	--	--	--	--	--	--	--	--	--	--
Hydroxymetolachlor	Pesticide	10/15	67	3.1786	12.7003	38.6524	--	--	--	--	--	--	--	--	--	--
MetolachlorOA	Pesticide	10/15	67	113.281	266.093	688.607	--	--	--	--	--	--	--	--	--	--
Clothianidin	Pesticide	10/15	67	6.7657	10.9884	25.2793	--	--	--	--	--	--	--	--	--	--
Sulfentrazone	Pesticide	9/15	60	19.6603	50.9656	185.131	--	--	--	--	--	--	--	--	--	--
2.4.D	Pesticide	9/15	60	39.3292	78.2735	305.899	--	--	--	--	--	--	--	--	--	--
OIAT	Pesticide	8/15	53	1.0884	8.7037	15.614	--	--	--	--	--	--	--	--	--	--
Sucralose	PPCP	8/15	53	133.681	271.275	782.415	--	--	--	--	--	--	--	--	--	--
Enterococci	Microbial	15/15	100	50	2600	11235	nd	nd	nd	nd	nd	--	--	--	--	--
Table S5. Information for the most common analytes detected for 15 Iowa streams, 2021.
[nd, not determined; --, not applicable; C, concentration/count; MPs, microplastics; PPCPs, pharmaceuticals and personal care products; ARGs, antibiotic resistance genes; PFAS, per- and polyfluoroalkyl substances; >, less than; Microplastic and ARG results are in counts. All other results are in concentrations; refer to S2 for method and unit information]

## Sheet: S6_SiteDetections
	Water Samples						Bed Sediment				Fish Samples
Site	MPs	Pesticides	PPCPs	ARGs	PFAS	total	MPs	ARGs	PFAS	total	MPs	Pesticides	PPCPs	PFAS	total	Detections by site
Big Bear Creek at Ladora, Iowa	1	13	2	3	1	20	1	13	0	14	1	0	0	2	3	37
Burr Oak Creek near Perkins, Iowa	1	21	7	2	0	31	1	13	4	18	NS	NS	NS	NS	--	49
Camp Creek near Runnells, Iowa	1	15	3	10	1	30	1	10	1	12	--	0	0	9	9	51
Deer Creek near Coralville, Iowa	1	14	2	7	1	25	1	4	0	5	1	0	0	9	10	40
Elk River near Almont, Iowa	1	11	0	5	0	17	1	9	3	13	--	0	0	1	1	31
HM-2	1	21	1	5	3	31	1	8	0	9	--	0	0	1	1	41
Little Floyd River near Sanborn, Iowa	1	10	7	3	1	22	1	13	7	21	--	0	1	10	11	54
Mud Lake near Jewell, Iowa	1	23	2	4	1	31	1	6	1	8	--	1	0	4	5	44
Muddy Creek near Coralville, Iowa	1	16	12	5	0	34	1	2	1	4	1	0	3	14	18	56
North Cedar Creek near Clayton, Iowa	1	5	0	5	0	11	1	NS	1	2	NS	0	1	3	4	17
Pilot Creek at County Highway P15 near Rolfe, Iowa	1	21	1	2	1	26	1	8	1	10	1	1	0	3	5	41
Cardinal Creek below Newton, Iowa	1	26	12	3	0	42	1	6	14	21	NS	NS	NS	NS	--	63
South Fork Iowa River near New Providence, Iowa	1	19	1	6	1	28	1	4	1	6	1	1	0	4	6	40
Storm Creek near Glidden, Iowa	1	17	1	9	2	30	1	8	2	11	--	0	0	8	8	49
South White Breast Creek near Osceola, Iowa	1	25	2	5	0	33	1	11	1	13	--	1	0	7	8	54
Table S6. Detection counts by site and compound class for 15 Iowa streams, 2021.
[NS, no sample; --, not applicable; MPs, microplastics; PPCPs, pharmaceuticals and personal care products; ARGs, antibiotic resistance genes; PFAS, per- and polyfluoroalkyl substances]

## Sheet: S7_Spearman
Variables	MP particle counts, by site		MP total count by site		MP mass, by site	MP SB counts, by site		PFAS total concentration by site		ARG WS detections, by site		ARG SB detections, by site		ARG total counts, by site		PPCP sum, by site		PPCP detections, by site		Pharmaceutical detections, by site		Pharmaceutical sum, by site		NWQL pesticide detections, by site		NWQL pesticide sum, by site
	WS, counts	rho WS, counts	Total count for all samples	rho, total count for all samples	WS, mass	SB, counts	rho, SB, counts	Total concentration for all samples	rho, total concentration for all samples	WS, number of detections	rho, WS, number of detections	SB, number of detections	rho, SB, number of detections	total detections, WS and SB	rho, total detections, WS and SB	WS, sum of PPCP concentrations	rho, sum of PPCP concentrations	WS, number of PPCP detections	rho, WS, number of PPCP detections	WS, number of pharmaceutical detections	rho, WS number of pharmaceutical detections	WS, sum of pharmaceutical concentrations	rho, sum of pharmaceutical concentrations	WS, number of pesticide detections	rho, number of pesticide detections	WS, sum of pesticide concentrations	rho, sum of pesticide concentrations
Water samples
1H-Benzotriazole	0.4615	--	0.9131	--	0.8048	0.482	--	0.2883	--	0.9296	--	0.3563	--	0.3563	--	0.03606	0.684324	0.06252	--	0.06252	--	0.03606	0.710566	0.6584	--	0.7417	--
2.4.D	0.02836	-0.5645	0.6633	--	0.4127	0.2364	--	0.6308	--	0.1926	--	0.3866	--	0.05285	--	0.7735	--	0.9974	--	0.7517	--	0.8883	--	--	--	--	--
4/5-methyl-1H-benzotriazole	0.4972	--	0.1028	--	0.7139	0.9488	--	0.4972	--	0.6121	--	0.7841	--	0.4993	--	0.4194	--	0.346	--	0.4852	--	0.4194	--	0.3556	--	0.7139	--
Acetochlor	0.9091	--	0.684	--	0.1131	0.8689	--	0.4493	--	0.9793	--	0.6391	--	0.818	--	0.8489	--	0.07051	--	0.05729	--	0.8576	--	--	--	--	--
Acetochlor +OA, SA	0.7084	--	0.1956	--	0.7133	0.06866	--	0.995	--	0.5185	--	0.6079	--	0.8036	--	0.7926	--	0.8972	--	0.7512	--	0.6963	--	--	--	--	--
AcetochlorOA	0.4704	--	0.07084	--	0.4964	0.07932	--	0.8744	--	0.3293	--	0.404	--	0.6592	--	0.513	--	0.5065	--	0.5621	--	0.6528	--	--	--	--	--
AcetochlorSA	0.5275	--	0.02521	-0.574117	0.5499	0.06628	--	0.974	--	0.4226	--	0.3337	--	0.6971	--	0.5945	--	0.4837	--	0.3504	--	0.9256	--	--	--	--	--
Ammonia (NH3 + NH4+)	0.959	--	0.8167	--	0.9675	0.9384	--	0.4191	--	0.1478	--	0.5653	--	0.9483	--	0.1776	--	0.09905	--	0.02291	0.581728	0.1555	--	0.2724	--	0.7669	--
ARG water detections	0.3	--	0.1782	--	0.5954	0.1203	--	0.3469	--	--	--	--	--	--	--	--	--	--	--	--	--	--	--	--	--	--	--
Atrazine	0.4114	--	0.8727	--	0.4924	0.9446	--	0.8929	--	0.9382	--	0.934	--	0.9696	--	0.9798	--	0.5326	--	0.5238	--	0.8495	--	--	--	--	--
Atrazine +CAAT, CEAT, CIAT, OIAT, OIET	0.7435	--	0.4266	--	0.7133	0.7025	--	0.8626	--	0.7858	--	0.5813	--	0.7792	--	0.265	--	0.1721	--	0.1523	--	0.2105	--	--	--	--	--
BLYES	0.8213	--	0.4896	--	0.9639	0.6365	--	0.3546	--	0.7726	--	0.6201	--	0.7789	--	0.9101	--	0.4729	--	0.841	--	0.7228	--	0.04251	0.529195	0.1121	--
CAAT	0.7926	--	0.02748	0.575	0.8792	0.0259	0.571931	0.3748	--	0.7216	--	0.5813	--	0.4961	--	0.1354	--	0.1288	--	0.2094	--	0.1956	--	--	--	--	--
Carbamazepine	0.75	--	0.75	--	0.4167	0.9741	--	0.4167	--	0.3675	--	0.2621	--	0.4167	--	0.75	--	0.1056	--	--	--	--	--	0.75	--	0.9167	--
CEAT	0.3564	--	0.3814	--	0.6547	0.4126	--	0.1407	--	0.5741	--	0.06898	--	0.1088	--	0.9898	--	0.729	--	0.5426	--	0.9236	--	--	--	--	--
CIAT	0.7532	--	0.2012	--	0.9217	0.2621	--	0.8525	--	0.9639	--	0.6966	--	0.8187	--	0.1411	--	0.1958	--	0.1393	--	0.1261	--	--	--	--	--
Clothianidin	0.7236	--	0.8272	--	0.5529	0.5409	--	0.6484	--	0.5346	--	0.9864	--	0.8579	--	0.7364	--	0.5283	--	0.08408	--	0.8799	--	0.4453	--	0.788	--
Desvenlafaxine	0.9167	--	0.9167	--	1	0.6601	--	0.4167	--	0.75	--	0.4167	--	0.3333	--	0.08333	--	0.05132	--	--	--	--	--	0.3333	--	1	--
Dimethenamid	0.843	--	0.3635	--	0.4684	0.363	--	0.833	--	0.1766	--	0.388	--	0.7571	--	0.4574	--	0.6022	--	0.6276	--	0.5758	--	--	--	--	--
Discharge	0.3538	--	0.2264	--	0.1763	0.3138	--	0.8124	--	0.707	--	0.3751	--	0.2737	--	0.7274	--	0.8718	--	0.5377	--	0.6067	--	0.8391	--	0.5067	--
Enterococci	0.4388	--	0.168	--	0.9323	0.4562	--	0.3614	--	0.6588	--	0.7396	--	0.8584	--	0.47	--	0.776	--	0.9123	--	0.5885	--	0.5266	--	0.2314	--
Escherichia coli	0.763	--	0.5934	--	0.4866	0.8872	--	0.9949	--	0.07231	--	0.9543	--	0.4167	--	0.1658	--	0.2789	--	0.5238	--	0.2341	--	0.8391	--	0.8929	--
Fexofenadine	0.3333	--	1	--	0.3333	0.8993	--	0.333	--	0.333	--	0.3333	--	0.3333	--	0.333	--	0.3333	--	--	--	--	--	1	--	1	--
Fluconazole	0.3333	--	1	--	1	0.807	--	1	--	1	--	1	--	1	--	0.3333	--	0.3333	--	--	--	--	--	1	--	1	--
Fungicide count (number of detections)	0.5544	--	0.5455	--	0.5382	0.6822	--	0.8091	--	0.04291	-0.528325	0.7566	--	0.4325	--	0.5102	--	0.2846	--	0.1781	--	0.4888	--	--	--	--	--
Fungicide sum (sum of concentrations detected)	0.6233	--	0.5166	--	0.3141	0.8365	--	0.8976	--	0.09994	--	0.9741	--	0.3563	--	0.623	--	0.3388	--	0.1465	--	0.6138	--	--	--	--	--
Guanylurea	0.3333	--	0.75	--	0.3333	0.8967	--	0.08333	--	0.7892	--	0.08333	--	0.3333	--	0.75	--	0.2621	--	--	--	--	--	0.3333	--	0.75	--
Herbicide count (number of detections)	0.3543	--	0.4916	--	0.9567	0.5813	--	0.8634	--	0.6003	--	0.7086	--	0.8272	--	0.6037	--	0.6714	--	0.6211	--	0.7301	--	--	--	--	--
Herbicide sum (sum of concentrations detected)	0.9132	--	0.2212	--	0.6602	0.1933	--	0.7926	--	0.9125	--	0.934	--	0.8386	--	0.5452	--	0.5857	--	0.5423	--	0.401	--	--	--	--	--
Heterotrophic bacteria	0.02637	-0.578571	0.8425	--	0.3475	0.7477	--	0.382	--	0.6497	--	0.5858	--	0.2229	--	0.766	--	0.9846	--	0.6841	--	0.8544	--	0.7605	--	0.211	--
Imidacloprid	0.4312	--	0.5991	--	0.4848	0.4936	--	0.01644	0.606862	0.05685	--	0.2345	--	0.8678	--	0.06456	--	0.2184	--	0.236	--	0.06676	--	--	--	--	--
Insecticide count (number of detections)	0.4853	--	0.2316	--	0.2489	0.2312	--	0.0006559	0.776899	0.8351	--	0.03516	-0.546199	0.015	-0.613505	0.1095	--	0.1122	--	0.08821	--	0.2143	--	--	--	--	--
Insecticide sum (sum of concentrations detected)	0.5024	--	0.3047	--	0.4385	0.5794	--	0.001104	0.756276	0.8813	--	0.04024	-0.534184	0.01916	-0.59554	0.1216	--	0.1749	--	0.1251	--	0.2224	--	--	--	--	--
Lidocaine	1	--	1	--	1	0.8979	--	1	--	1	--	1	--	1	--	1	--	0.01779	0.601062	--	--	--	--	1	--	1	--
Metformin	1	--	0.8918	--	0.3095	0.6473	--	0.6168	--	0.964	--	0.9352	--	0.9856	--	2.2e-16	0.9678	0.3582	--	--	--	--	--	0.6853	--	0.1197	--
Methocarbamol	0.3333	--	1	--	1	0.807	--	1	--	1	--	1	--	1	--	0.3333	--	0.3333	--	--	--	--	--	1	--	1	--
Metolachlor	0.4738	--	0.6114	--	0.3982	0.7036	--	0.763	--	0.3504	--	0.4428	--	0.7694	--	0.6384	--	0.9691	--	0.8365	--	0.7418	--	--	--	--	--
Metolachlor + OA, SA	0.5151	--	0.1963	--	0.4468	0.1821	--	0.7926	--	0.2232	--	0.6357	--	0.8686	--	0.6248	--	0.282	--	0.2625	--	0.4624	--	--	--	--	--
MetolachlorOA	0.1532	--	0.311	--	0.4574	0.354	--	0.4664	--	0.7459	--	0.4192	--	0.5337	--	0.4964	--	0.6547	--	0.4765	--	0.3268	--	--	--	--	--
MetolachlorSA	0.7926	--	0.1916	--	0.6084	0.3175	--	0.7827	--	0.1624	--	0.2552	--	0.7114	--	0.3307	--	0.1093	--	0.1436	--	0.2341	--	--	--	--	--
MP Counts (parts per liter)	--	--	0.9132	--	--	0.5886	--	0.532	--	--	--	--	--	--	--	--	--	--	--	--	--	--	--	--	--	--	--
MP Mass	--	--	0.2442	--	--	0.2236	--	0.6937	--	--	--	--	--	--	--	--	--	--	--	--	--	--	--	--	--	--	--
Neonic count (number of detections)	0.8811	--	1	--	0.6069	0.9404	--	0.1886	--	0.939	--	0.2982	--	0.2462	--	0.5215	--	0.8187	--	0.4594	--	0.5215	--	0.06515	--	0.3218	--
Neonic sum (sum of concentrations detected)	0.7934	--	0.8281	--	0.7541	0.9694	--	0.2605	--	0.6346	--	0.4343	--	0.5473	--	0.6889	--	0.7992	--	0.3626	--	0.5873	--	0.04453	0.524897	0.2664	--
Nitrate plus nitrite	0.8929	--	0.04883	0.521429	0.8863	0.04014	0.534406	0.5067	--	0.5626	--	0.1338	--	0.2983	--	0.5239	--	0.7515	--	0.8204	--	0.6754	--	0.8991	--	0.6114	--
Nitrite	0.6024	--	0.8929	--	0.516	0.9094	--	0.1159	--	0.169	--	0.04225	--	0.1217	--	0.7084	--	0.4572	--	0.2532	--	0.6801	--	0.4977	--	0.763	--
NWQL pesticide count (number of detections)	0.8904	--	0.3462	--	0.665	0.4218	--	0.4337	--	0.3848	--	1	--	0.6724	--	0.4489	--	0.3221	--	--	--	--	--	--	--	--	--
NWQL pesticide sum (sum of concentrations detected)	0.8727	--	0.2264	--	0.7268	0.3374	--	0.7532	--	0.8614	--	0.8885	--	0.7792	--	0.6568	--	0.7076	--	--	--	--	--	--	--	--	--
NWQL PFAS count (number of detections)	0.2424	--	0.3906	--	0.7315	0.6589	--	0.01096	0.635085	0.6531	--	0.4476	--	0.2325	--	0.4029	--	0.05465	--	0.03837	0.538463	0.4029	--	0.8951	--	0.9071	--
NWQL PFAS sum (sum of concentrations detected)	0.0485	-0.51689	0.9427	--	0.3084	0.5095	--	0.09052	--	0.1023	--	0.8639	--	0.1841	--	0.7608	--	0.2326	--	0.1252	--	0.7359	--	0.6167	--	0.9844	--
NWQL PFBA	0.6605	--	0.4119	--	0.6913	0.104	--	0.7237	--	0.8149	--	0.8977	--	0.9738	--	0.7334	--	0.9044	--	0.8422	--	0.7087	--	0.9634	--	0.8961	--
NWQL PFOA	0.07113	--	0.6686	--	0.08677	0.127	--	0.9112	--	0.7012	--	0.349	--	0.1917	--	0.7295	--	0.6743	--	0.8611	--	0.7875	--	0.3774	--	0.09634	--
NWQL PFPeA	0.6833	--	1	--	0.2606	0.5123	--	0.1835	--	0.3533	--	0.4534	--	0.7405	--	0.715	--	0.5474	--	0.2874	--	0.662	--	0.7468	--	0.5174	--
OIET	0.6858	--	0.3011	--	0.9005	0.4388	--	0.9031	--	0.5018	--	0.5947	--	0.8386	--	0.9446	--	0.9486	--	0.989	--	0.8843	--	--	--	--	--
Orthophosphate	0.9234	--	0.237	--	0.6866	0.351	--	0.4039	--	0.4246	--	0.2142	--	0.5556	--	0.1885	--	0.006761	0.665597	0.01157	0.631479	0.1123	--	0.4415	--	0.01486	-0.625
Pharmaceutical count (number of detections)	0.4833	--	0.5658	--	0.7919	0.4439	--	0.215	--	0.3486	--	0.5528	--	0.8953	--	--	--	--	--	--	--	--	--	0.2514	--	0.6689	--
Pharmaceutical sum (sum of concentrations detected)	0.245	--	0.6568	--	0.3135	0.7034	--	0.4744	--	0.8207	--	0.7688	--	0.6732	--	--	--	--	--	--	--	--	--	0.5394	--	0.4989	--
Phosphorus	0.5844	--	0.4266	--	0.8511	0.5933	--	0.2649	--	0.3829	--	0.121	--	0.3513	--	0.04341	0.527257	0.0004632	0.789599	0.003568	0.701427	0.02423	0.577301	0.6375	--	0.06021	--
PPCP count (number of detections)	0.3273	--	0.6645	--	0.4868	0.5409	--	0.1251	--	0.3158	--	0.449	--	0.8199	--	--	--	--	--	--	--	--	--	--	--	--	--
PPCP sum (sum of concentrations detected)	0.2182	--	0.4584	--	0.1992	0.5325	--	0.334	--	0.8207	--	0.9339	--	0.8185	--	--	--	--	--	--	--	--	--	--	--	--	--
Specific conductance (field)	0.3649	--	0.9044	--	0.6021	0.8693	--	0.9849	--	0.276	--	0.4744	--	0.8785	--	0.3715	--	0.1065	--	0.02504	0.574673	0.2794	--	0.894	--	0.1956	--
Sucralose	0.5821	--	0.2431	--	0.1289	0.467	--	0.115	--	0.6625	--	0.3524	--	0.2763	--	0.752	--	0.381	--	0.381	--	0.8401	--	0.1323	--	0.5008	--
Sulfamethoxazole	0.9565	--	0.8699	--	0.3206	0.4925	--	0.1731	--	0.6433	--	0.3812	--	0.234	--	0.1032	--	0.002949	0.673486	--	--	--	--	0.9779	--	0.08352	--
Sulfentrazone	0.6106	--	0.5274	--	0.8224	0.5398	--	0.3069	--	0.828	--	0.7222	--	0.9035	--	0.7219	--	0.7756	--	0.8504	--	0.5008	--	--	--	--	--
Suspended sediment concentration	0.001833	0.734112	0.5359	--	0.5112	0.649	--	0.2974	--	0.9485	--	0.08393	--	0.02484	0.575299	0.4552	--	0.4088	--	0.5506	--	0.5506	--	0.6093	--	0.5837	--
Suspended sediment mass	0.002733	0.732143	0.4984	--	0.4924	0.5844	--	0.2212	--	0.9485	--	0.08488	--	0.02706	0.56836	0.503	--	0.4216	--	0.4922	--	0.5625	--	0.6012	--	0.5934	--
Total coliforms	0.8773	--	0.2021	--	0.6326	0.5277	--	0.6606	--	0.2038	--	0.5609	--	0.8662	--	0.07738	--	0.1325	--	0.1295	--	0.05635	--	0.9794	--	0.8067	--
Total nitrogen	0.8626	--	0.0471	0.525	0.8022	0.04599	0.521895	0.2649	--	0.1559	--	0.02614	0.571194	0.2024	--	0.9647	--	0.3479	--	0.316	--	0.805	--	0.5923	--	0.3203	--
Turbidity (field)	0.006525	0.682143	0.442	--	0.4982	0.5581	--	0.954	--	0.8108	--	0.03044	0.558581	0.03945	0.535985	0.08498	--	0.002364	0.722128	0.01843	0.598448	0.0673	--	0.9697	--	0.5493	--
Venlafaxine	0.3333	--	1	--	0.3333	0.8993	--	0.3333	--	0.333	--	0.3333	--	0.3333	--	0.3333	--	0.3333	--	--	--	--	--	1	--	1	--
Basin characteristics
Animal units in basin	0.9899	--	0.2696	--	0.09752	0.3125	--	0.0882	--	0.6915	--	0.2505	--	0.2543	--	0.5394	--	0.1916	--	0.5269	--	0.5224	--	0.8786	--	0.6746	--
Developed landuse	0.5667	--	0.6575	--	0.6866	0.8495	--	0.1261	--	0.751	--	0.3609	--	0.4716	--	0.01749	0.602324	0.0001781	0.8206	0.0003782	0.796635	0.006641	0.666669	0.8292	--	0.1485	--
Cultivated landuse	0.9949	--	0.3268	--	0.4303	0.401	--	0.05243	--	0.4246	--	0.3933	--	0.4555	--	0.3614	--	0.1567	--	0.3449	--	0.289	--	0.684	--	0.2012	--
Drainage basin size	0.3074	--	0.6024	--	0.3005	0.6615	--	0.3268	--	0.6544	--	0.2116	--	0.3376	--	0.5239	--	0.2728	--	0.2786	--	0.4744	--	0.1712	--	0.0471	0.525
Pasture in basin	0.5978	--	0.2395	--	0.6336	0.3106	--	0.1532	--	0.2393	--	0.7541	--	0.9695	--	0.7416	--	0.3616	--	0.7355	--	0.6109	--	0.9191	--	0.5712	--
Population in basin	0.6848	--	0.5366	--	0.9359	0.7609	--	0.1139	--	0.6636	--	0.286	--	0.4355	--	0.06702	--	0.0006143	0.779354	0.001204	0.752618	0.03539	0.545617	0.894	--	0.1747	--
WWTP in basin (number)	0.1607	--	0.974	--	0.1751	0.7888	--	0.7391	--	0.7868	--	0.05981	--	0.03179	0.554892	0.4319	--	0.6495	--	0.7546	--	0.3636	--	0.7984	--	0.6707	--
Bed sediment
ARG bed sediment detections	0.07064	--	0.2194	--	0.7415	0.2845	--	0.09198	--	--	--	--	--	--	--	--	--	--	--	--	--	--	--	--	--	--	--
Bed sediment Escherichia coli	0.08343	--	0.1668	--	0.6294	0.2323	--	0.4977	--	0.8609	--	0.2177	--	0.1723	--	0.9696	--	0.9175	--	0.2478	--	0.4252	--	0.623	--	0.9396	--
Bed sediment heterotrophic bacteria	0.05082	--	0.5292	--	0.8568	0.6069	--	0.5343	--	0.477	--	0.0006986	0.77451	0.004449	0.689585	0.83	--	0.4877	--	0.8032	--	0.461	--	0.6786	--	0.8738	--
Bed sediment MP Counts	0.7563	--	3.461e-10	0.977659	0.6401	--	--	0.1373	--	0.1203	--	0.2845	--	--	--	0.5235	--	0.5409	--	--	--	--	--	--	--	--	--
Bed sediment PFAS count (number of detections)	0.6149	--	0.8795	--	0.4772	0.9723	--	0.3001	--	0.2615	--	0.2189	--	0.5476	--	0.1225	--	0.1352	--	0.05802	--	0.1033	--	0.4021	--	0.7564	--
Bed sediment PFAS sum (sum of concentrations detected)	0.2698	--	0.8333	--	0.385	0.8889	--	0.2639	--	0.2215	--	0.481	--	0.9795	--	0.231	--	0.437	--	0.219	--	0.22	--	0.4179	--	0.9949	--
Bed sediment total coliforms	0.08343	--	0.04066	0.539286	0.7447	0.0673	--	0.9234	--	0.8058	--	0.025	0.574798	0.0642	--	0.9144	--	0.8414	--	0.4352	--	0.6158	--	0.994	--	0.9396	--
Combined matrix results
ARG total counts	0.002499	0.719443	0.7989	--	0.4583	1	--	0.1832	--	--	--	--	--	--	--	--	--	--	--	--	--	--	--	--	--	--	--
Table S7. Spearman p-values and associated rho values for 15 Iowa streams, 2021.
[--, not applicable; red text, negative correlation; green text, positive correlation; ARG, antibiotic resistance genes; MP, microplastics; PFAS, per and polyfluoroalkyl substance; PPCP, pharmaceuticals and personal care products; NWQL, National Water Quality Laboratory; WS, water sample; SB, bed sediment sample; refer to tables S2, S3, and S4 for analyte and method information]

## Sheet: S8_MPCounts
Site	Sample date	Water	Bed sed	Fish
Big Bear Creek at Ladora, Iowa	20210406	E4124	109435	301
Burr Oak Creek near Perkins, Iowa	20210505	159	18633	NS
Camp Creek near Runnells, Iowa	20210602	E17033	27951	NA
Deer Creek near Coralville, Iowa	20210421	246	35589	1168
Elk River near Almont, Iowa	20210616	143	62362	NA
HM-2	20210518	396	43668	NA
Little Floyd River near Sanborn, Iowa	20210505	577	51216	NA
Mud Lake near Jewell, Iowa	20210504	358	3782	NA
Muddy Creek near Coralville, Iowa	20210421	201	9551	199
North Cedar Creek near Clayton, Iowa	20210616	112	53437	NA
Pilot Creek at County Highway P15 near Rolfe, Iowa	20210504	171	61799	295
Cardinal Creek below Newton, Iowa	20210518	207	88664	NS
South Fork Iowa River near New Providence, Iowa	20210503	220	17193	877
Storm Creek near Glidden, Iowa	20210517	468	10974	NA
South White Breast Creek near Osceola, Iowa	20210601	592	43668	NA
Table S8. Microplastic sample counts by matrix for 15 Iowa streams, 2021.
[Sample date, YYYYMMDD, NA, not analyzed; NS, no sample]

## Sheet: S9_SampleBoxPlots
Figure S9. Log transformed areas of microplastic particles by site for bed sediment and fish samples for 15 Iowa streams, 2021. Refer to Table S1 for site information.

## Sheet: S10_Histograms
Figure S10. Histograms of microplastic particle size distributions by site for water, bed sediment, and fish samples for 15 Iowa streams, 2021. Refer to Table S1 for site information.

[truncated: 4 more sheets: S11_MP_sitestats, S12_EAR, S13_Chem_TQ, References]
